# Supplementary material
Source: publisher figshare collection journal article supplement (https://springernature.figshare.com/ndownloader/files/21504549)
Supplement: Supplementary file 1 [file 21504549]

## Sheet: Sheet1
Table S7. The primeres involved in this study
primer name	primer sequence
NbRT-2-F	AATGAAGAAGCAGAAGAA
NbRT-2-R	AAGGTGGAGAATTAAGAAG
NbRT-3-F	ATCAATCACCAATACCATA
NbRT-3-R	GGATGTTACCTCTTCTAAT
NbRT-4-F	TTCTTGTCTGATATTAGGTT
NbRT-4-R	TCTTCTTGGTTGATGATTA
NbRT-173-F	AATTCTTGCTGATCTCAT
NbRT-173-R	CCTCTTCTTAGTCTTCTG
NbRT-38-F	TCTACTAGGAGACACTATC
NbRT-38-R	TCATTGCTACTATAATCACT
NbRT-40-F	AACATCATCGTCATCATT
NbRT-40-R	CTCTTCACCATTCTCATT
NbRT-72-F	GAATATGACAATGACTATGC
NbRT-72-R	TTTCTGCTGTAAACTGAG
NbRT-74-F	AAGTTCAAGTAGTTCAAGT
NbRT-74-R	GTAATTCAGCCATCTCAA
NbRT-75-F	CACACAAATAACATTCAGT
NbRT-75-R	CATCTATAACCATCATCCA
NbRT-77-F	TAACTCTATGAATGGATGG
NbRT-77-R	AATATCAACCTGACTTCTT
NbRT-78-F	TAGCAACATTCAAGAAGA
NbRT-78-R	GTAATAGTCGTCATAATCG
NbRT-94-F	GTTGAAGAAGATGGAGAA
NbRT-94-R	GTGAAGAGTCAGTAGAAG
NbRT-95-F	ATTAGGCTTCACTTACTTG
NbRT-95-R	GTTGGACTCAATGCTATT
NbRT-99-F	TAGTGATTAAGCAAGAAGA
NbRT-99-R	TCATTAACAGCCATAACA
NbRT-103-F	CCTCATCAACTACATAGC
NbRT-103-R	TTTAGCCATCTCAATCTG
NbRT-111-F	ATTACTCGGCAGATACTA
NbRT-111-R	TATCACAACTATCCAGAAC
NbRT-114-F	GCAGTAACAGAATGAGAT
NbRT-114-R	TATGAGCCTGACTAATGA
NbRT-115-F	TTCATCTTCTTCACCTTC
NbRT-115-R	CTTCTTGTTATCATCATCAG
NbRT-116-F	ATCAAGAAGTCAATCACC
NbRT-116-R	TTAACATCCACAACAAGT
NbRT-117-F	ATTAGGATGGAATGTGTC
NbRT-117-R	ATGGTAGTGATGTTGAAG
NbRT-118-F	CGGTAATAAGTGGAAGAA
NbRT-118-R	GAGACAGTAGAAACAGAC
NbRT-119-F	ATTGTTGTGATGTTGAAG
NbRT-119-R	GTTGTTGTACCTATTGAAG
NbRT-126-F	TTACTTCAACAACTACAATG
NbRT-126-R	ACAACCATCTGATAATCC
NbRT-127-F	TTCAGATATTGTCCTCCA
NbRT-127-R	GATGACCTAGTTCCTTTG
NbRT-130-F	GATGACTGGATATGAACTT
NbRT-130-R	CCGATGACATAATAACAAC
NbRT-132-F	CTATGACTTCTCCACTTG
NbRT-132-R	CAGGTGAATTAAGCAATC
NbRT-134-F	TAGTTGCTGATATGTCCT
NbRT-134-R	CGTCATACTGTCATTGTT
NbRT-137-F	CCTTTGTCTACTTCTTCAT
NbRT-137-R	CTTATTGCTGGAACTCTT
NbRT-140-F	ATGTATGAGTTCAAAGTGA
NbRT-140-R	GTAATGATACTTCTGAGGAT
NbRT-166-F	ACTATTCTGCTGTATTCG
NbRT-166-R	AACTTCATAACGCTCTATT
NbRT-179-F	GTGATAGTAATGACTGATGA
NbRT-179-R	GCTGATGTTATAAGTGGAT
NbRT-201-F	ATTAGGCGTGTTAGATTC
NbRT-201-R	AACTGGTTGTTGTCATAG
NbRT-202-F	GTATCAACACTAACAATAACAG
NbRT-202-R	CTAATTCTTCGCCTTCTC
NbRT-203-F	CTATCCGATTATTACAACTAC
NbRT-203-R	ATTCACTTCCTTCACTTAT
NbRT-204-F	CTGAGGAGGCTAATATAAC
NbRT-204-R	TTGATGCGATAATTGGAT
NbRT-246-F	TTCTCAGCATTCATTATTAG
NbRT-246-R	CTTCTTGATACACTCCTT
NbRT-252-F	ACAATCTTACAACCAACA
NbRT-252-R	ATGAACCAGTCTACATCT
NbRT-267-F	TATTACGAGAGGATGAGA
NbRT-267-R	GAGGAAGTGATTGATGAT
NbRT-278-F	GAAGATGGTTATAGATGGA
NbRT-278-R	TGATTACGATTGATGGAT
NbRT-279-F	GAACACAGAGTAGAATAAC
NbRT-279-R	AGAAGAAGAAGAATCAGAA
NbRT-280-F	CATCTACAGAAGCAGTTA
NbRT-280-R	GATACACAATTCCTCACT
NbRT-281-F	TATAGGTGCTCCATTGAA
NbRT-281-R	GTTATCACATACCGACAG
NbRT-284-F	TATGCTGAAGAAGAAGAC
NbRT-284-R	AGAGTTGTGTATAGTATTGT
NbRT-285-F	AACGATAACAAGATGATGA
NbRT-285-R	TTAATTGGCACTGATACC
NbRT-286-F	CTACTGACCATAGGAACA
NbRT-286-R	CATCCATCTCTTCTTGAC
NbRT-296-F	TTGGTGTTCTTACTAACG
NbRT-296-R	ACTAACTTCCTCTTCCTT
PTRV-NbERF173-F	GCAAGAGCCTATGATAAG
PTRV-NbERF173-R	CGAAACTCCATAAATCTATC
PBinGFP2-NbERF173-F	ATGTGTGGTGGTGCAATTC
PBinGFP2-NbERF173-R	CAATTGAGTTATGGGCACTGTTGGA
PBinGFP2-NbPII-B-F	ATGGCGAAGTTAGCTCTCGTGGTTGC
PBinGFP2-NbPII-B-R	AACCAACCCGGGGAATTTGTACAACA
PBinGFP2-NbKTI1-F	ATGGAAGTTATTAACCTTACACGATTCA
PBinGFP2-NbKTI1-R	GATCTTGTGAAATGTAACTTTCAAAGGC
PII-B -F	TATTAGATAGTCTCATTGCTCGAG
PII-B -R	ATATAATGAGAGATGAATTCTAGTG
KTI1-F	TAAACCGATAAACCGCCCAGTAAC
KTI 1-R	TTGTTAAACTAACTTGTGAATGGAT
